# Supplementary figures and images for: Control in time and space: Tramtrack69 cooperates with Notch and Ecdysone to repress ectopic fate and shape changes during Drosophila egg chamber maturation
Source: Oxford University Press journal article supplement (doi:10.1242/dev.042770), 2009-11-23

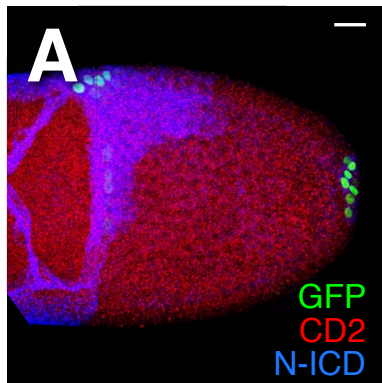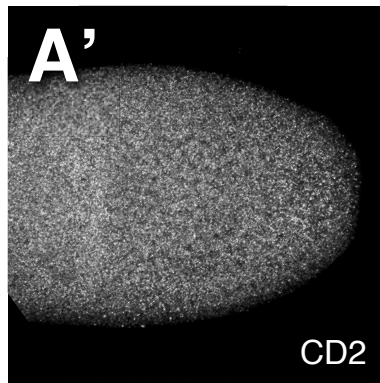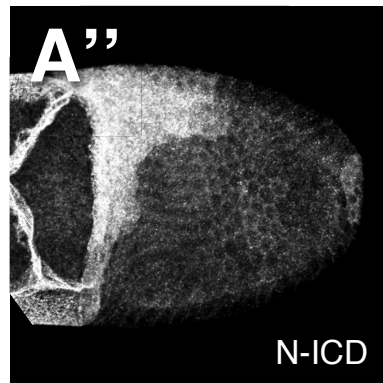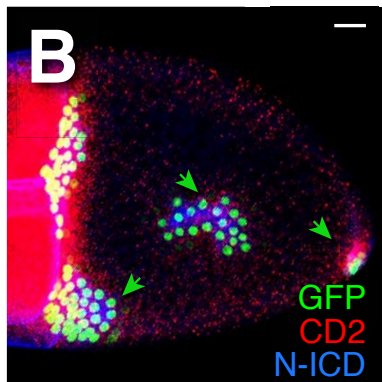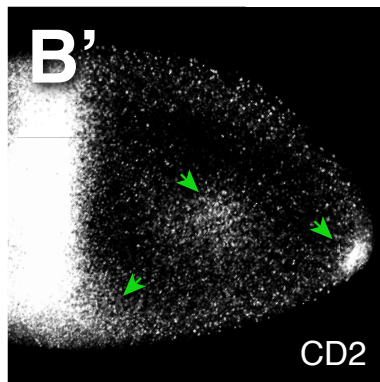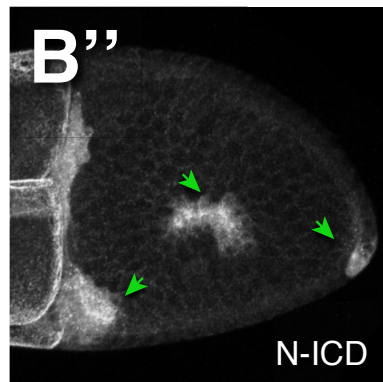

Supplement: dev042770-sup-042770-figs1.pdf [file dev042770-sup-042770-figs1.pdf]
